# Supplementary material for: BET bromodomain-mediated interaction between ERG and BRD4 promotes prostate cancer cell invasion
Source: PubMed Central journal article supplement (PMC5122392; doi:10.18632/oncotarget.9513), 2016-05-20
Supplement: oncotarget-07-38319-s001.pdf [file oncotarget-07-38319-s001.pdf]

## BET bromodomain-mediated interaction between ERG and BRD4 promotes prostate cancer cell invasion

### Supplementary Materials

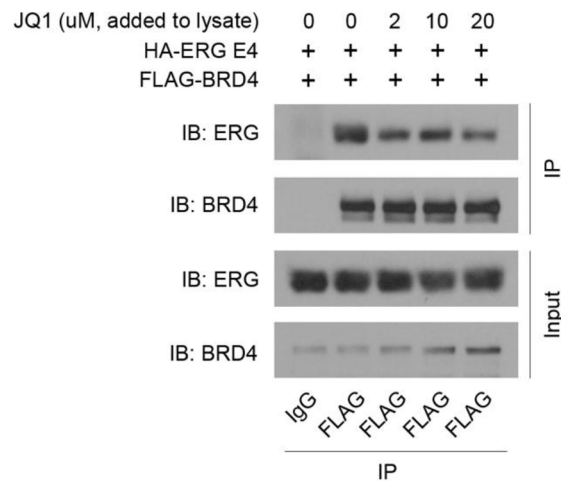

**Supplementary Figure S1: JQ1 diminishes the ERG-BRD4 interaction.** Western blot showing anti-FLAG antibody-mediated co-IP of over-expressed FLAG-BRD4 and HA-ERG T1-E4 in HEK293T cells. Increasing concentrations of JQ1 or DMSO were added directly to the cell lysate. IgG co-IP as a control.
